# Supplementary material
Source: ML conference proceedings conference paper supplement (https://openreview.net/forum?id=XEwBY1K1ty)
Supplement: supplementary_material [file attachment]

# Point-GCC : Universal Self-supervised 3D Scene Pre-training via Geometry-Color Contrast

## Supplementary Material

Anonymous Author(s)

### A IMPLEMENTATION DETAILS

In this section, we provide the details and hyperparameters for pre-training and transfer learning.

#### A.1 Experimental details

**Pre-training Details** Our pre-training settings are based on the default detection configs in MMDetection3D [3]. For all settings, we use the AdamW optimizer with an initial learning rate of 0.001 and weight decay of 0.0001. More detailed training configurations are shown in Table 1.

**Downstream Transferring Details** For 3D object detection task, we fine-tune with the PointNet++ [7] backbone for VoteNet [6], VoteNet+FF [9] and GroupFree-3D [5] and the MinkResNet [2] backbone for TR3D [9], TR3D+FF [9] respectively. For 3D instance segmentation task, we fine-tune with the MinkResNet backbone for TD3D [4] on ScanNet and S3DIS datasets. For 3D semantic segmentation task, we fine-tune with PointNet++ backbone for PointNet++(SSG) [7]. We follow the default setting in the corresponding downstream model. More detailed training configurations are shown in Table 1.

| Config                          | VoteNet        | GroupFree-3D   | PointNet++(SSG) | TR3D       | TD3D       |
|---------------------------------|----------------|----------------|-----------------|------------|------------|
| backbone                        | PointNet2SASSG | PointNet2SASSG | PointNet2SASSG  | MinkResNet | MinkResNet |
| Pre-training Details            |                |                |                 |            |            |
| optimizer                       | AdamW          | AdamW          | AdamW           | AdamW      | AdamW      |
| learning rate                   | 1e-3           | 1e-3           | 1e-3            | 1e-3       | 1e-3       |
| weight decay                    | 1e-4           | 1e-4           | 1e-4            | 1e-4       | 1e-4       |
| training epochs                 | 400            | 400            | 400             | 200        | 200        |
| lr scheduler                    | cosine         | cosine         | cosine          | cosine     | cosine     |
| batch size                      | 4x8            | 4x8            | 4x8             | 4x4        | 4x4        |
| augmentation                    | default        | default        | default         | default    | default    |
| Downstream Transferring Details |                |                |                 |            |            |
| optimizer                       | AdamW          | AdamW          | Adam            | AdamW      | AdamW      |
| learning rate                   | 4e-3           | 3e-3           | 1e-3            | 1e-3       | 1e-3       |
| weight decay                    | 1e-2           | 5e-4           | 1e-2            | 1e-4       | 1e-4       |
| training epochs                 | 72             | 160            | 200             | 24         | 66         |
| lr scheduler                    | step           | step           | cosine          | step       | step       |
| batch size                      | 8x8            | 8x4            | 16x2            | 16x1       | 6x1        |
| augmentation                    | default        | default        | default         | default    | default    |
| GPU device                      | RTX 2080Ti     | RTX 2080Ti     | RTX 2080Ti      | RTX 3090   | RTX 3090   |

Table 1: Training recipes for pretraining and downstream fine-tuning.

#### A.2 Implementation details of Deep Clustering

We provide a pseudo-code for Deep Clustering via Swapped Prediction training loop in Pytorch style as follows. All of the hyperparameters are the same as the previous works [1] in 2D. The temperature is set to 0.1 and the Sinkhorn regularization parameter is set to 0.05 for all runs.

```
# C: prototypes (DxK) i.e., linear layer
# feat: feature from backbone + projection head
```

```
# temp: temperature

def swapped_prediction(feats_geo, feats_color):

    # normalize prototypes
    with torch.no_grad():
        C = normalize(C, dim=0, p=2)

    # normalize features
    norm_geo = normalize(feats_geo, dim=-1, p=2)
    norm_color = normalize(feats_color, dim=-1, p=2)

    # compute scores
    scores_geo = mm(norm_geo, C)
    scores_color = mm(norm_color, C)

    # compute assignments
    with torch.no_grad():
        q_geo = sinkhorn(scores_geo)
        q_color = sinkhorn(scores_color)

    # convert scores to probabilities
    p_geo = Softmax(scores_geo / temp)
    p_color = Softmax(scores_color / temp)

    loss = - 0.5 * mean(q_geo * log(p_color) + q_color
    * log(p_geo))

# Sinkhorn-Knopp
def sinkhorn(scores, eps=0.05, niters=3):
    Q = exp(scores / eps).T
    Q /= sum(Q)
    K, B = Q.shape
    u, r, c = zeros(K), ones(K) / K, ones(B) / B
    for _ in range(niters):
        u = sum(Q, dim=1)
        Q *= (r / u).unsqueeze(1)
        Q *= (c / sum(Q, dim=0)).unsqueeze(0)
    return (Q / sum(Q, dim=0, keepdim=True)).T
```

### B ADDITIONAL EXPERIMENTS

#### B.1 Pseudo-label Classes

We compare the results with different pseudo-label classes in deep clustering to analyze the effect of cluster distribution. The results in table 2 show that more pseudo-label classes degrade the performance of downstream tasks. We guess that finer-grained labels in

the ScanNet dataset, such as matching to ScanNet200 [8], show more apparent characteristics of long-tailed data, contrary to our assumption of equal cluster distribution because we are agnostic to the ground truth labels in pre-training.

| Pseudo-label Classes | Object Detection |                  |
|----------------------|------------------|------------------|
|                      | AP <sub>25</sub> | AP <sub>50</sub> |
| 20                   | 65.3             | 44.1             |
| 40                   | 64.3             | 43.7             |
| 200                  | 63.9             | 42.6             |

**Table 2: Ablation study of the pseudo-label classes in Deep Clustering.**

## B.2 Error elimination

To obtain statistically significant results, we train our models five times and evaluate each trained model five times independently on erratic downstream tasks. Table 3 shows the best and the average value (in brackets).

| Method                   | ScanNetV2          |                    | SUN RGB-D          |                    | S3DIS              |                    |
|--------------------------|--------------------|--------------------|--------------------|--------------------|--------------------|--------------------|
|                          | AP <sub>25</sub>   | AP <sub>50</sub>   | AP <sub>25</sub>   | AP <sub>50</sub>   | AP <sub>25</sub>   | AP <sub>50</sub>   |
| VoteNet+FF [9]           | -                  | -                  | 64.5 (63.7)        | 39.2 (38.1)        | -                  | -                  |
| + Point-GCC              | -                  | -                  | <u>64.9</u> (64.2) | <u>41.3</u> (40.6) | -                  | -                  |
| GroupFree-3D [5]         | 66.3 (65.7)        | 47.8 (47.7)        | -                  | -                  | -                  | -                  |
| + Point-GCC              | <u>68.1</u> (67.3) | <u>49.2</u> (48.7) | -                  | -                  | -                  | -                  |
| TR3D [9]                 | 72.9 (72.0)        | 59.3 (57.4)        | 67.1 (66.3)        | 50.4 (49.6)        | 74.5 (72.1)        | 51.7 (47.6)        |
| + Point-GCC              | <u>73.1</u> (72.2) | <u>59.6</u> (57.2) | <u>67.7</u> (66.1) | <u>51.0</u> (49.9) | 74.9(72.6)         | 53.2(50.9)         |
| + Point-GCC <sup>†</sup> | -                  | -                  | -                  | -                  | <u>75.1</u> (73.5) | <u>56.7</u> (54.4) |
| TR3D+FF [9]              | -                  | -                  | 69.4 (68.7)        | 53.4 (52.4)        | -                  | -                  |
| + Point-GCC              | -                  | -                  | <u>69.7</u> (69.0) | <u>54.0</u> (53.3) | -                  | -                  |

**Table 3: 3D Object detection results on ScanNetV2 validation set. The main result is the best value, and the number within the bracket is the average value across 25 trials following previous works [5, 9]. <sup>†</sup> means with extra training dataset ScanNetV2.**

## REFERENCES

- [1] Mathilde Caron, Ishan Misra, Julien Mairal, Priya Goyal, Piotr Bojanowski, and Armand Joulin. 2020. Unsupervised Learning of Visual Features by Contrasting Cluster Assignments. In *Advances in Neural Information Processing Systems 33: Annual Conference on Neural Information Processing Systems 2020, NeurIPS 2020, December 6-12, 2020, virtual*, Hugo Larochelle, Marc'Aurelio Ranzato, Raia Hadsell, Maria-Florina Balcan, and Hsuan-Tien Lin (Eds.). <https://proceedings.neurips.cc/paper/2020/hash/70feb62b69f16e0238f741fab228fec2-Abstract.html>
- [2] Christopher Choy, JunYoung Gwak, and Silvio Savarese. 2019. 4D Spatio-Temporal ConvNets: Minkowski Convolutional Neural Networks. In *Proceedings of the IEEE Conference on Computer Vision and Pattern Recognition*. 3075–3084.
- [3] MMDetection3D Contributors. 2020. MMDetection3D: OpenMMLab next-generation platform for general 3D object detection. <https://github.com/open-mmlab/mmdetection3d>.
- [4] Maksim Kolodiaznyi, Danila Rukhovich, Anna Vorontsova, and Anton Konushin. 2023. Top-Down Beats Bottom-Up in 3D Instance Segmentation. *CoRR* abs/2302.02871 (2023). <https://doi.org/10.48550/arXiv.2302.02871> arXiv:2302.02871
- [5] Ze Liu, Zheng Zhang, Yue Cao, Han Hu, and Xin Tong. 2021. Group-Free 3D Object Detection via Transformers. In *2021 IEEE/CVF International Conference on Computer Vision, ICCV 2021, Montreal, QC, Canada, October 10-17, 2021*. IEEE, 2929–2938. <https://doi.org/10.1109/ICCV48922.2021.00294>
- [6] Charles R. Qi, Or Litany, Kaiming He, and Leonidas J. Guibas. 2019. Deep Hough Voting for 3D Object Detection in Point Clouds. In *Int. Conf. Comput. Vis. (ICCV)*. IEEE, 9276–9285.

- [7] Charles Ruizhongtai Qi, Li Yi, Hao Su, and Leonidas J. Guibas. 2017. PointNet++: Deep Hierarchical Feature Learning on Point Sets in a Metric Space. In *Adv. Neural Inform. Process. Syst. (NIPS)*. 5099–5108.
- [8] Dávid Rozenberszki, Or Litany, and Angela Dai. 2022. Language-Grounded Indoor 3D Semantic Segmentation in the Wild. In *Eur. Conf. Comput. Vis. (ECCV)*.
- [9] Danila Rukhovich, Anna Vorontsova, and Anton Konushin. 2023. TR3D: Towards Real-Time Indoor 3D Object Detection. *CoRR* abs/2302.02858 (2023). <https://doi.org/10.48550/arXiv.2302.02858> arXiv:2302.02858
